# Supplementary material for: Additional pathways of sterol metabolism: Evidence from analysis of Cyp27a1−/− mouse brain and plasma
Source: PubMed Central journal article supplement (PMC6327153; doi:10.1016/j.bbalip.2018.11.006), 2019-02
Supplement: mmc1.pdf [file mmc1.pdf]

# S1

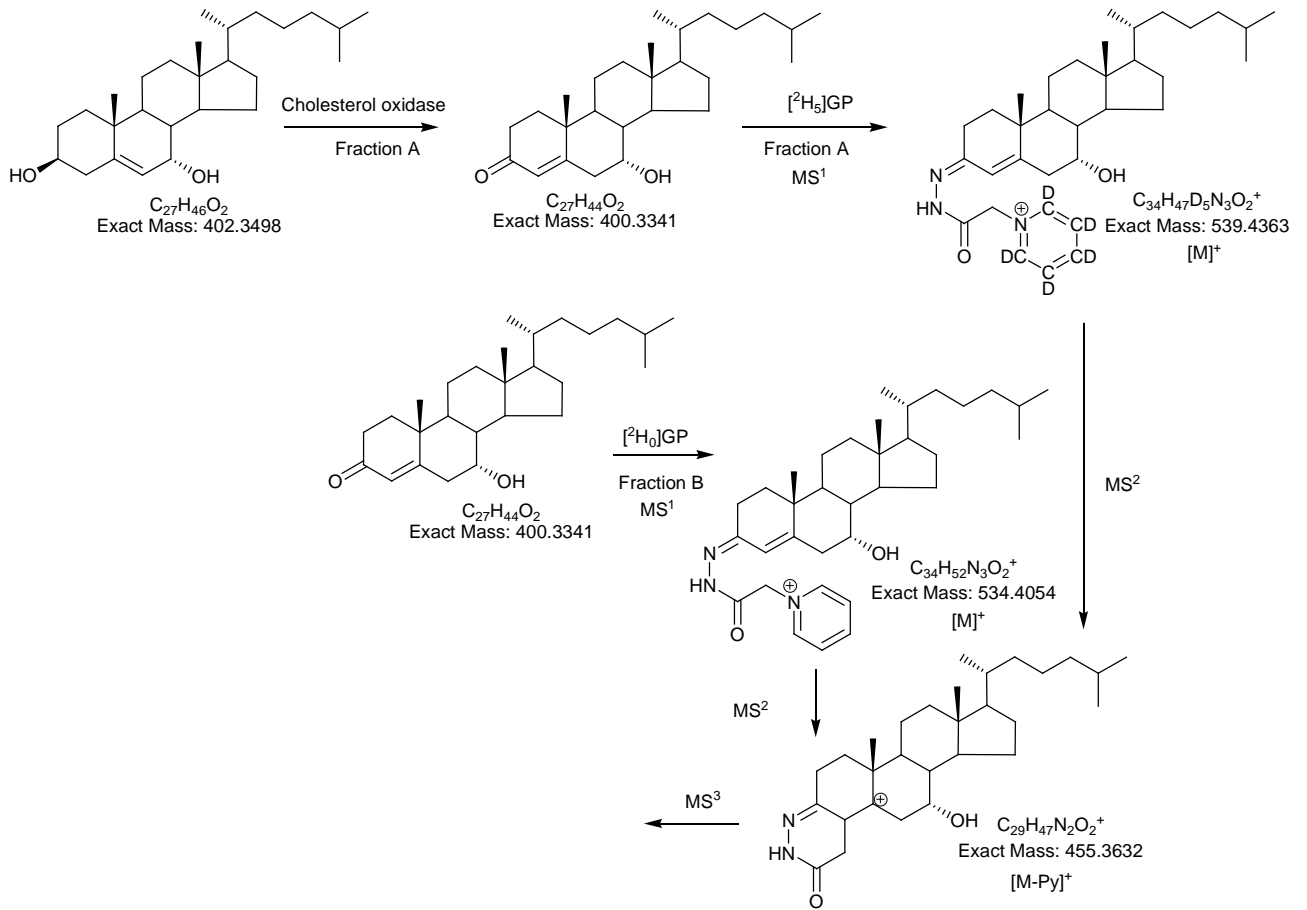

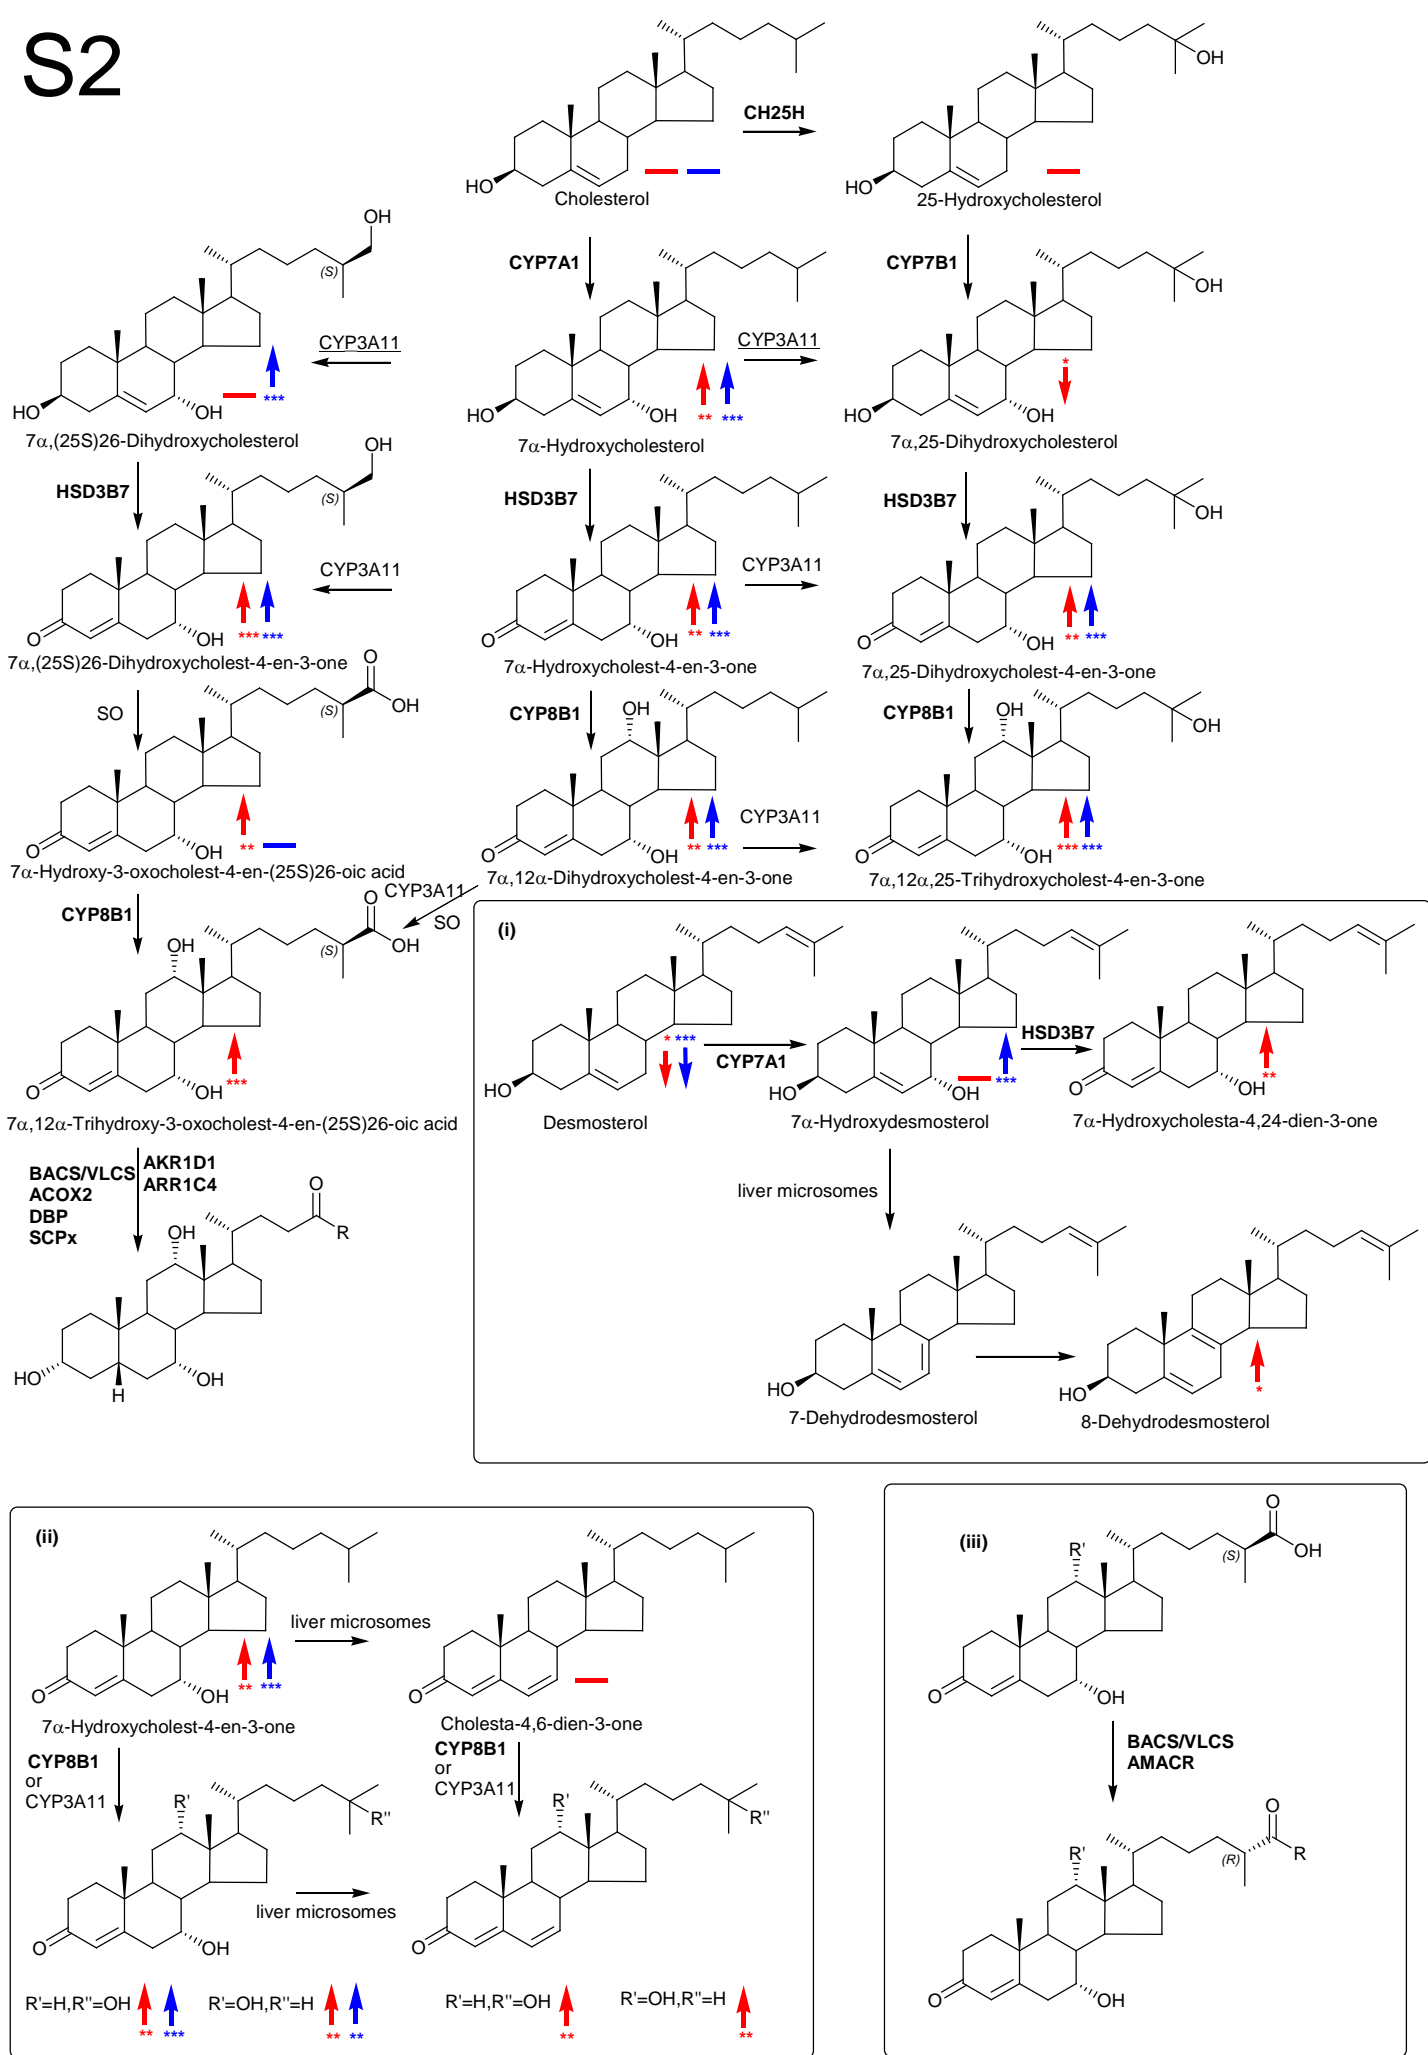



# S4A

RIC: 537.4206 ± 10 ppm

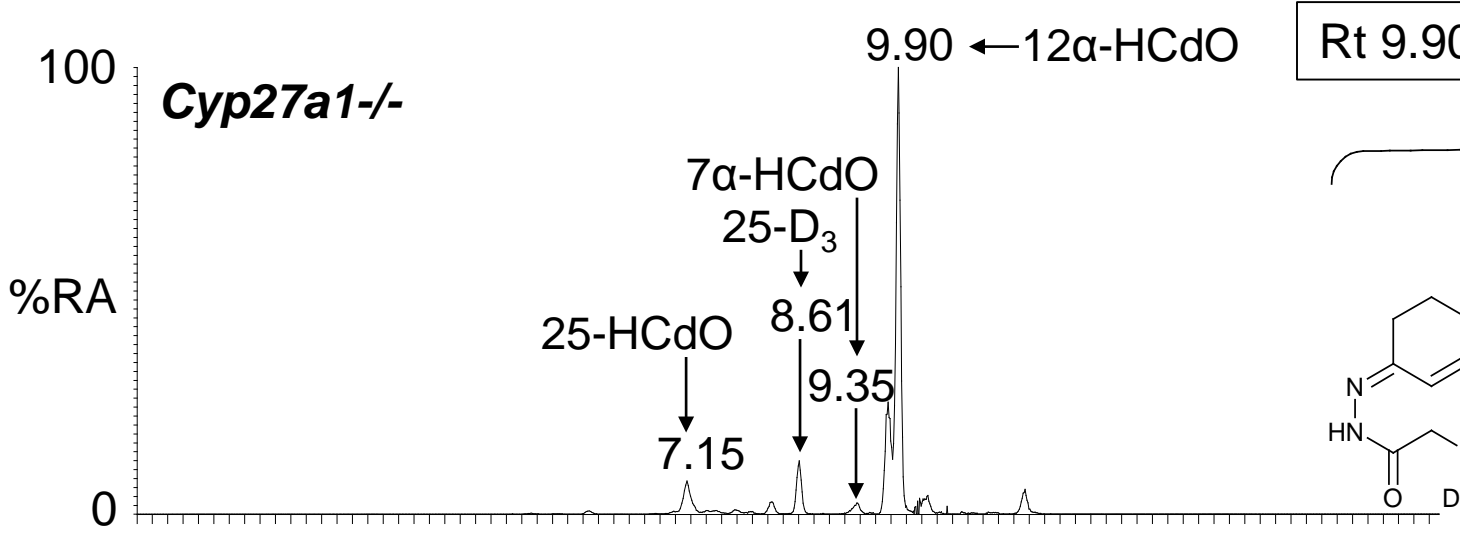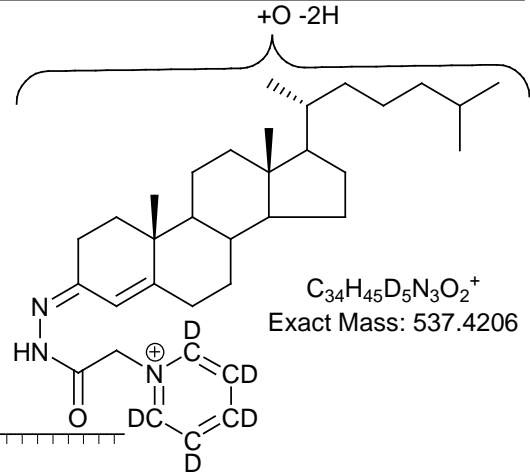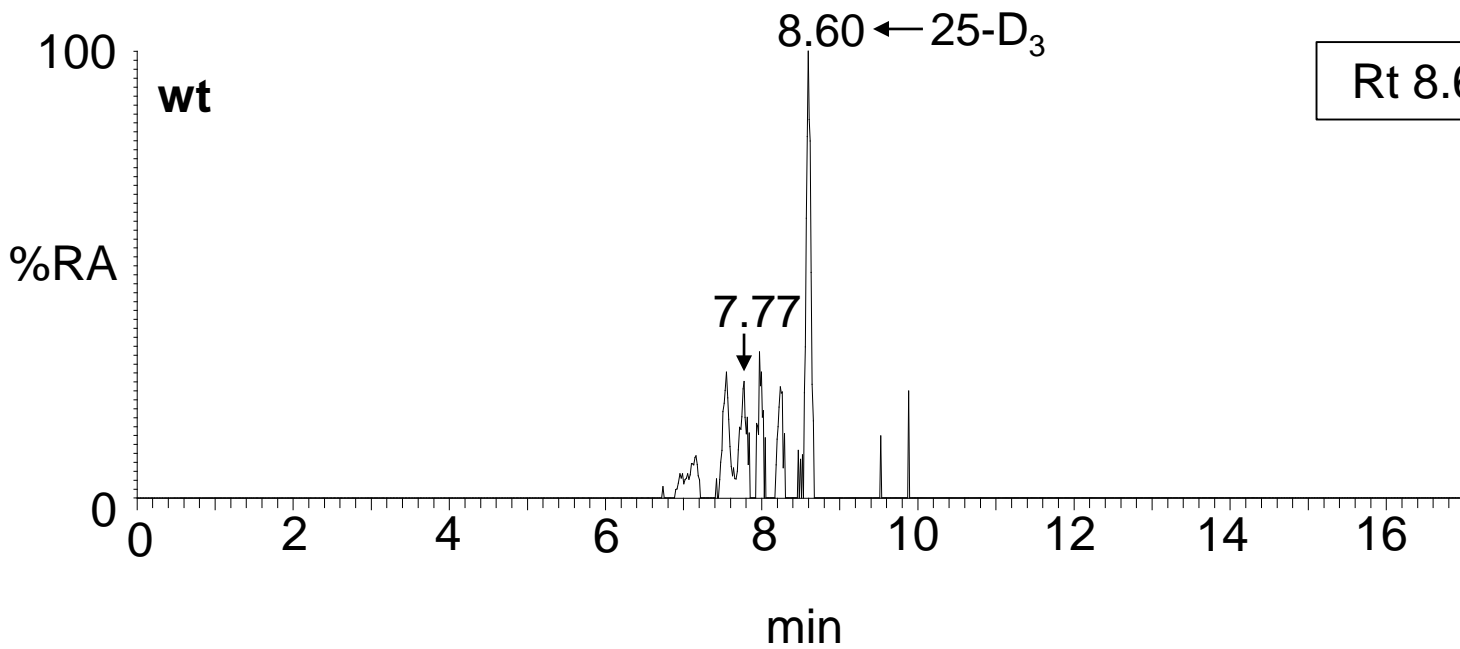

min

# S4B

RIC: 536.4211 ± 10 ppm

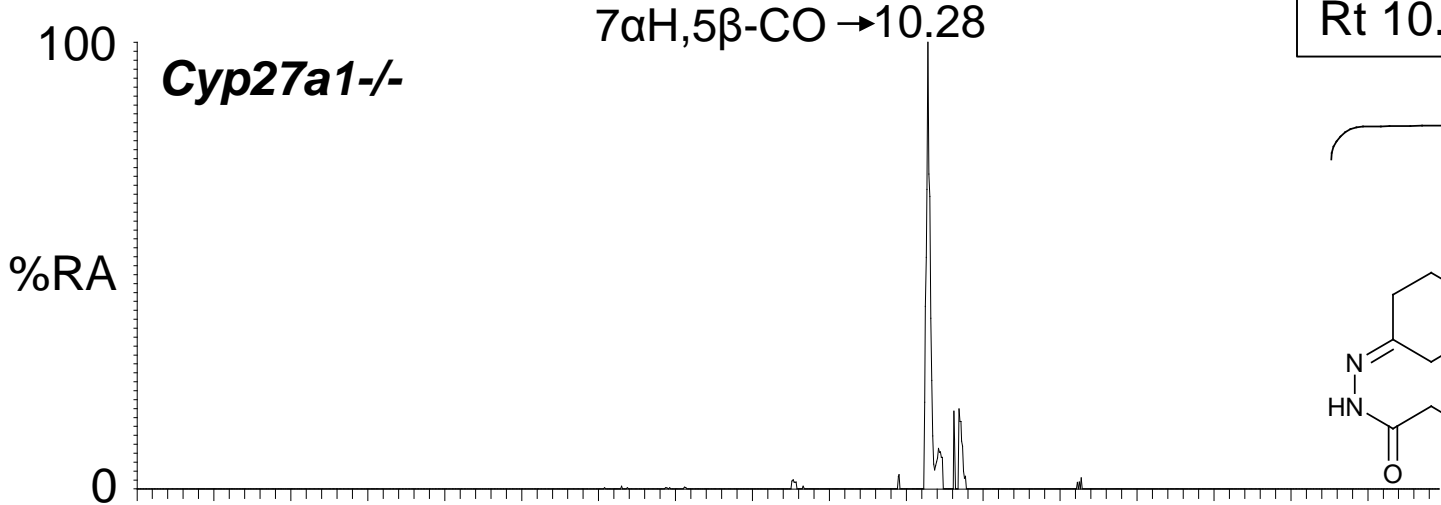

Rt 10.28 min, 10 ng/mL

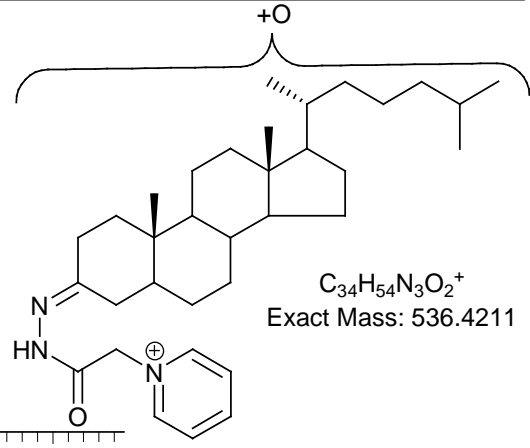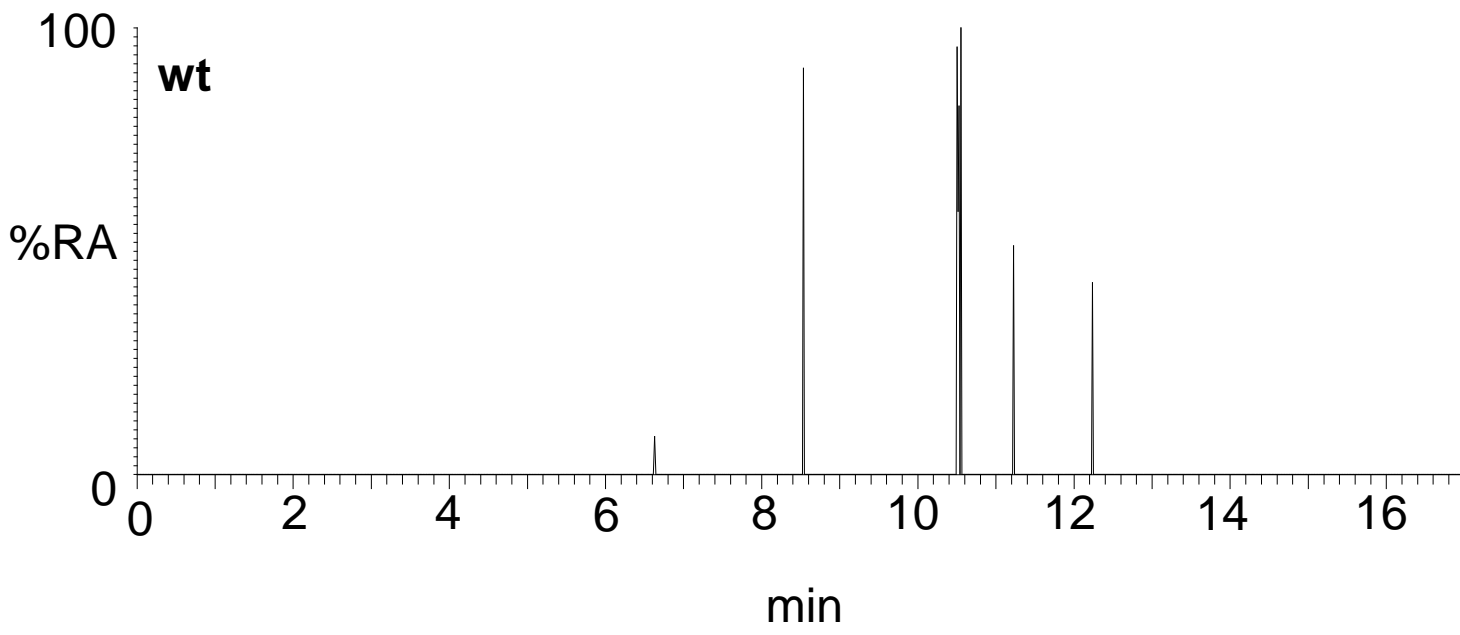

# S4C

RIC: 552.4160 ± 10 ppm

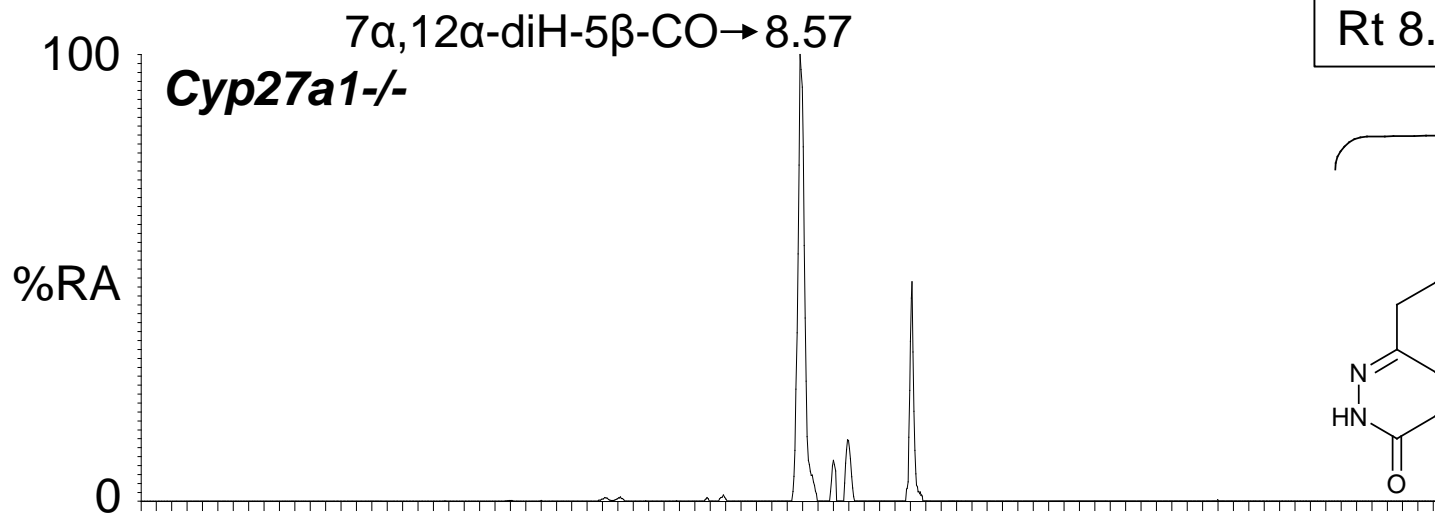

Rt 8.57 min, 35 ng/mL

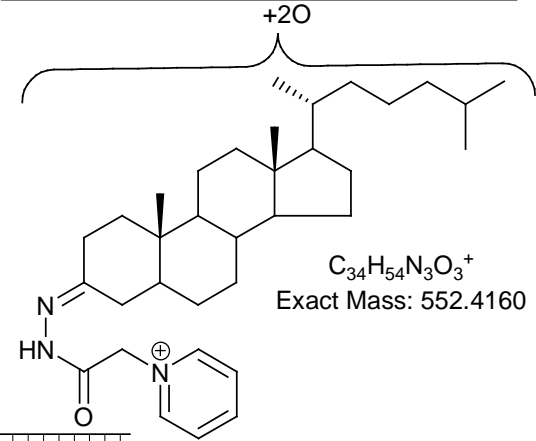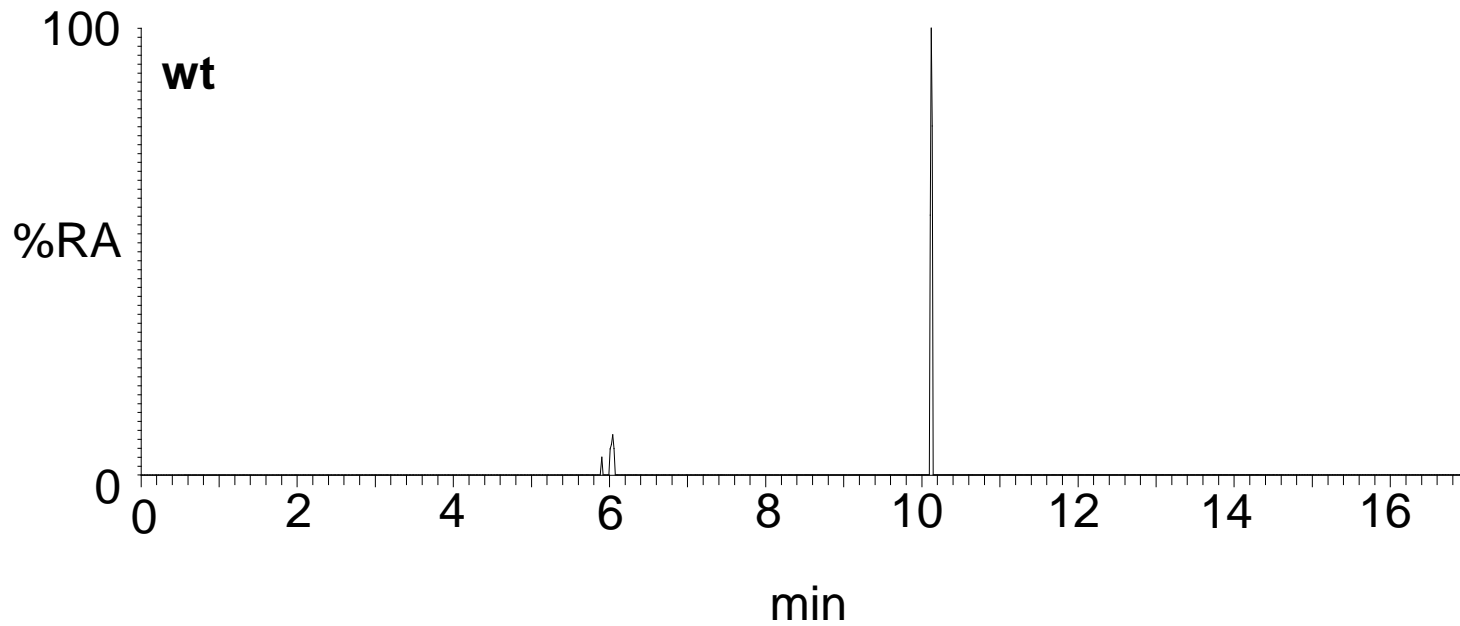

# S5A

RIC: 523.4414 ± 10 ppm

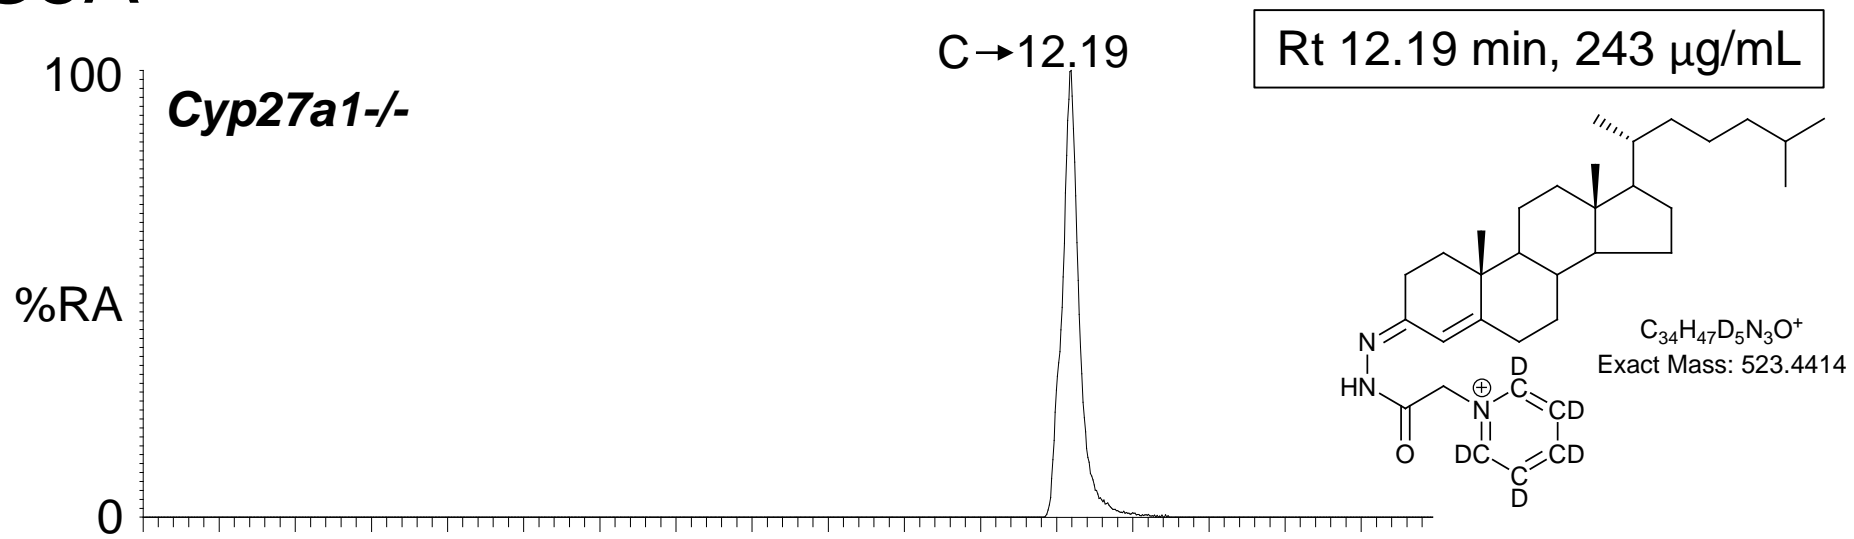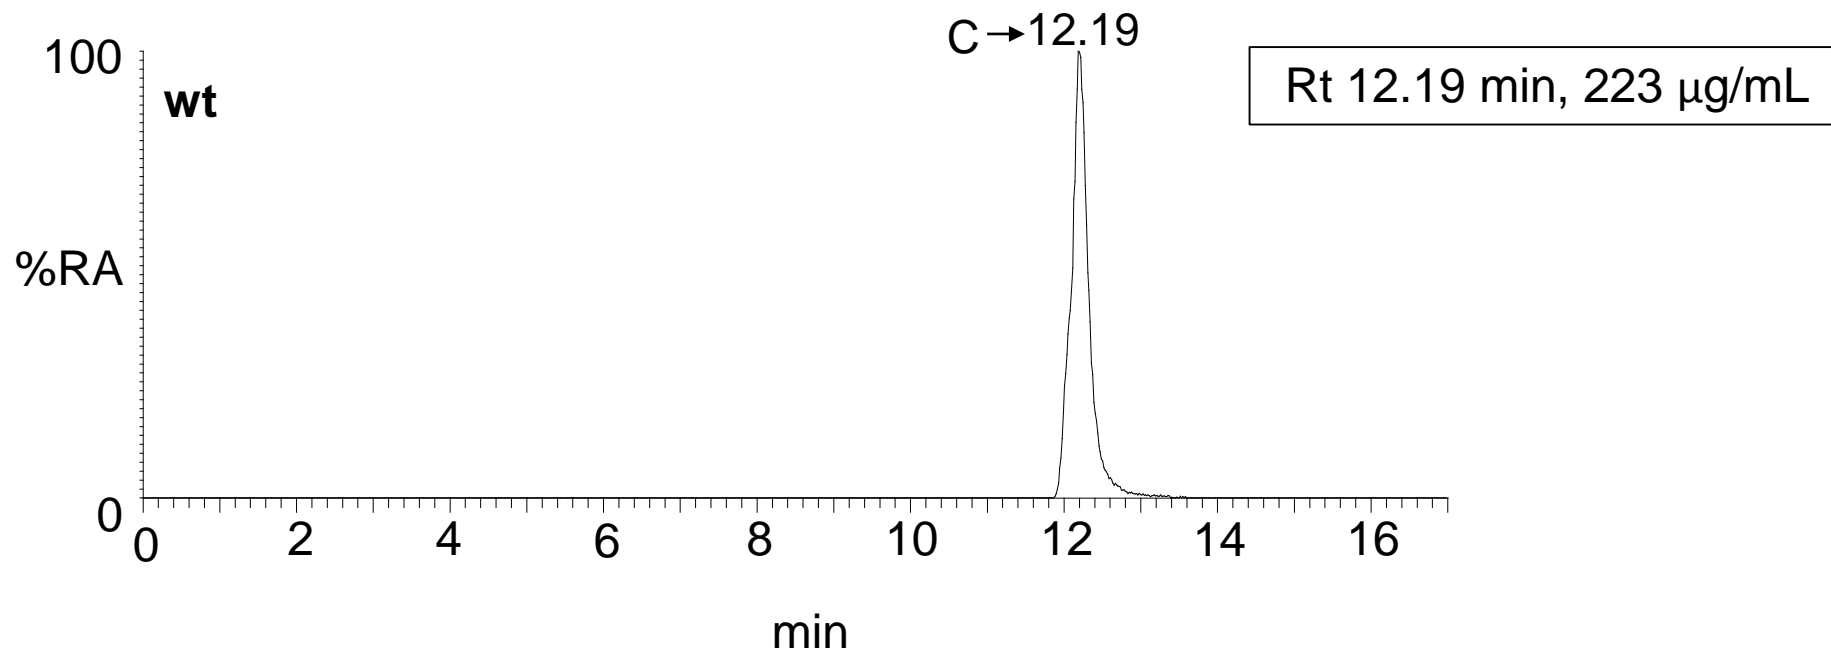

# S5B

## MS<sup>3</sup>: 518→439→

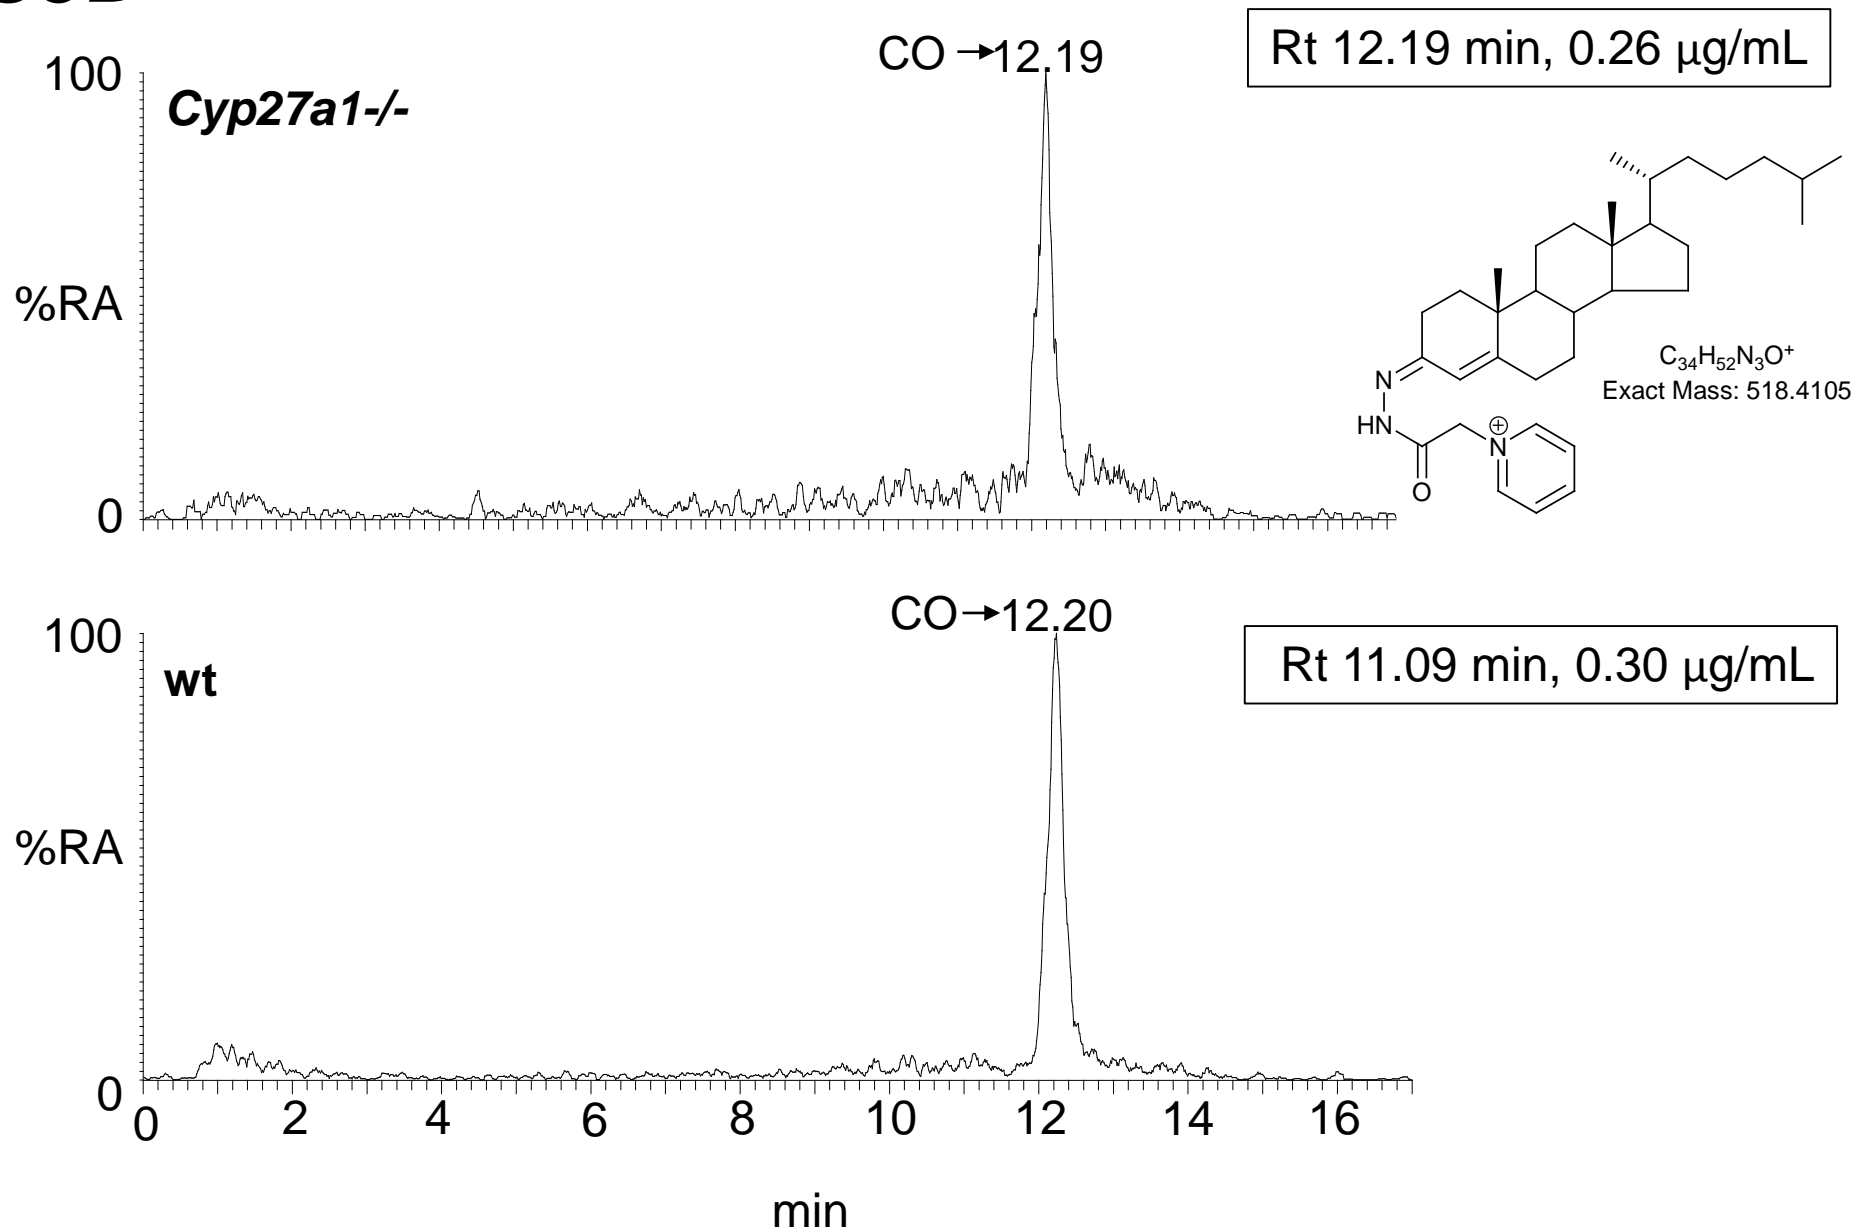



# S5C

## MS<sup>3</sup>: 521→437→

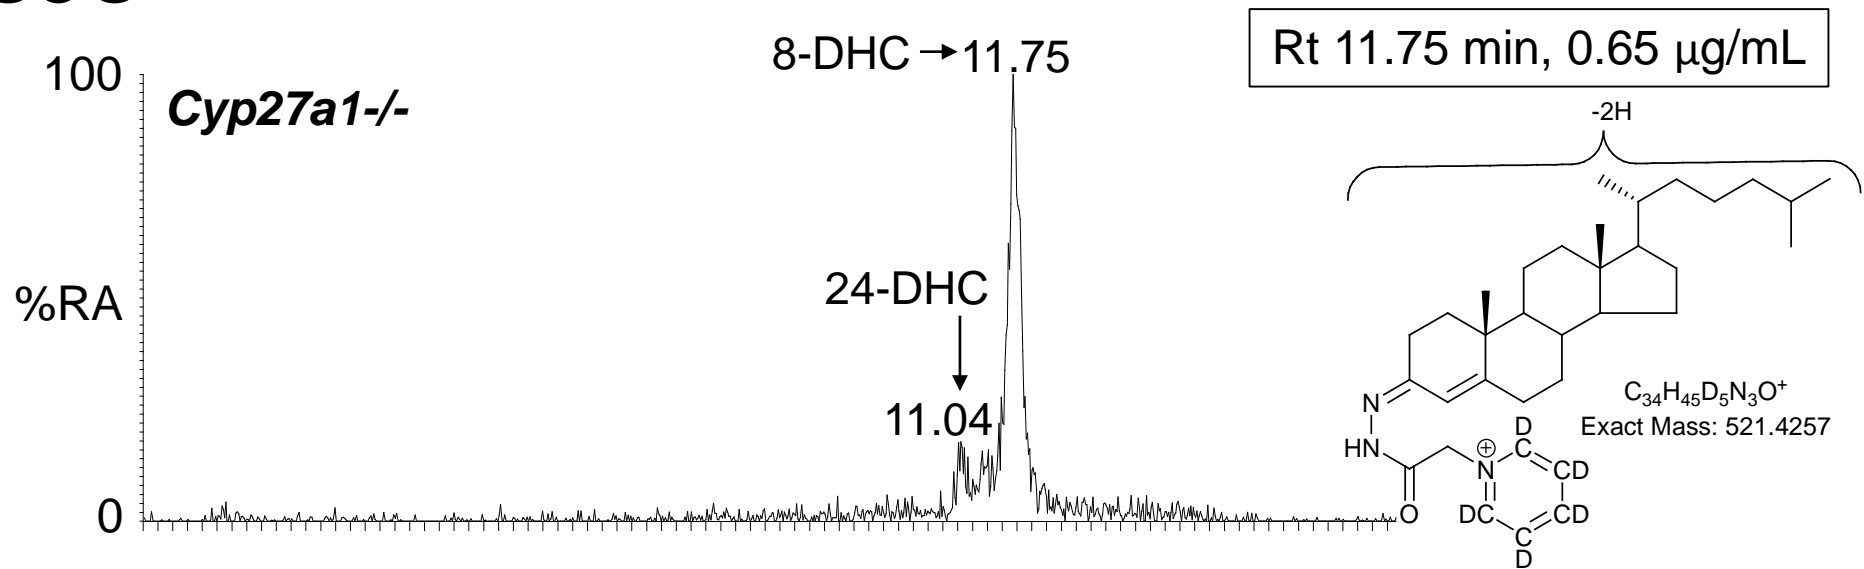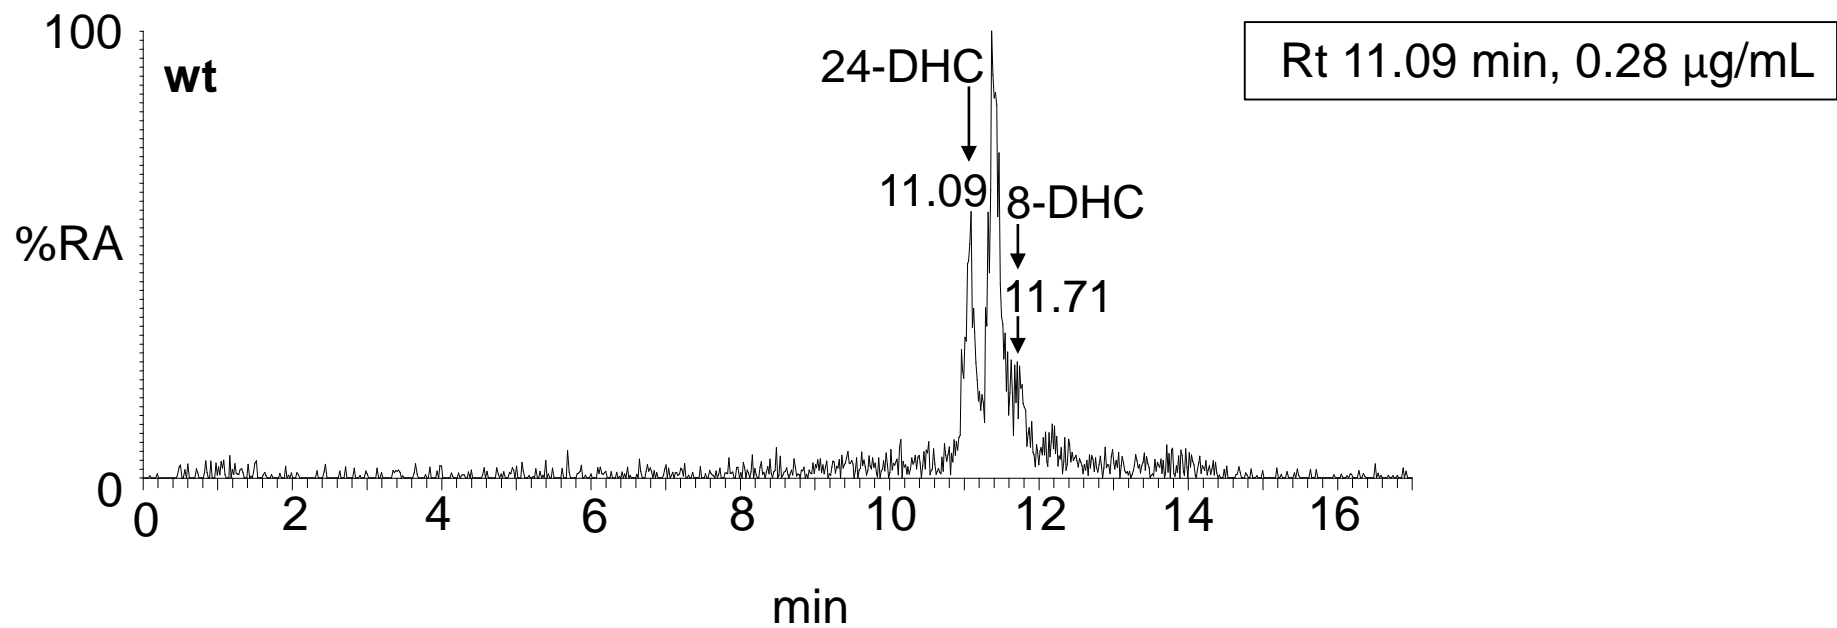

# S5D

## MS<sup>3</sup>: 516→437→

*Cyp27a1*<sup>-/-</sup>

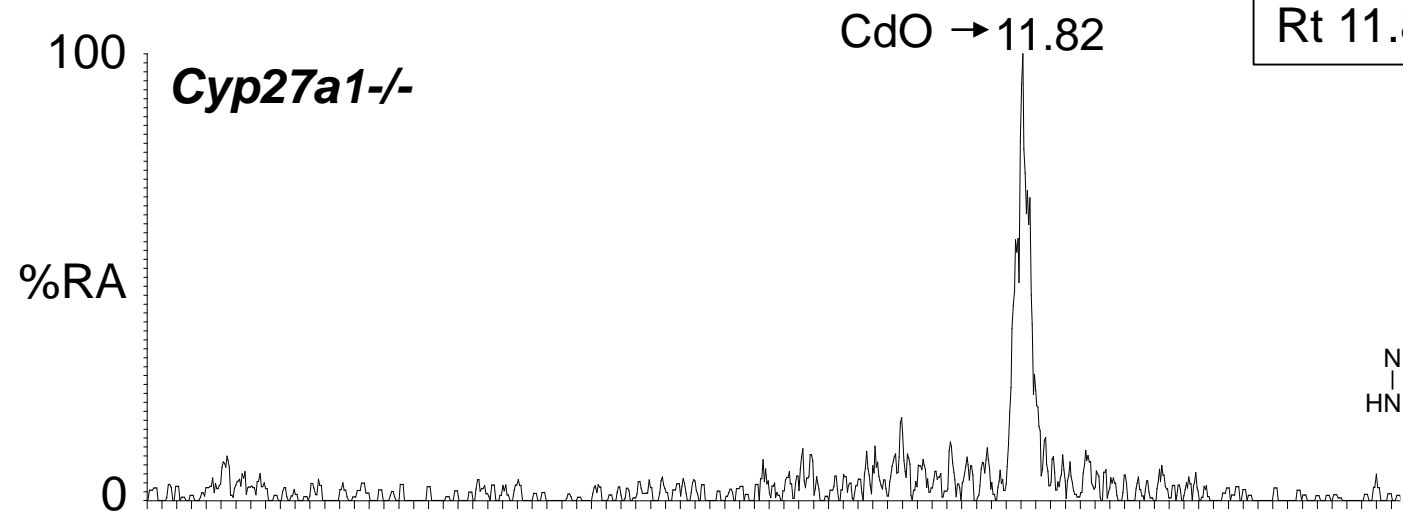

Rt 11.82 min, 0.21 μg/mL

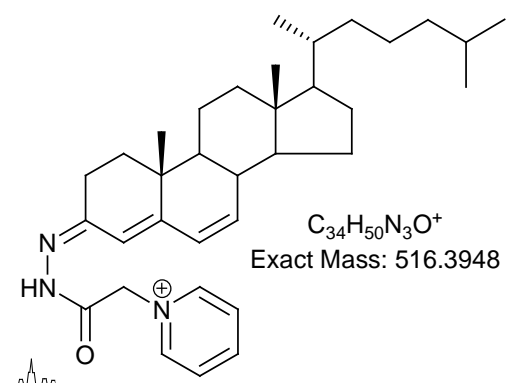

**wt**

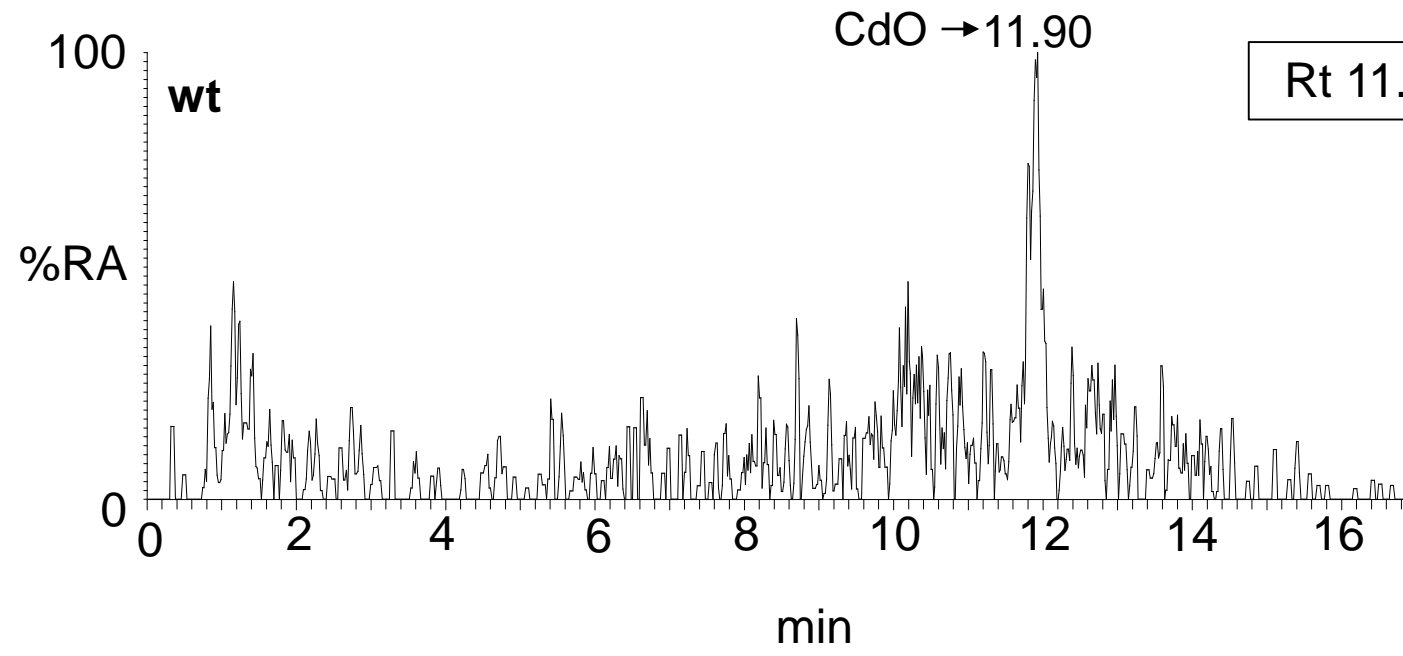

Rt 11.90 min, 0.07 μg/mL

min

# S5E

## MS<sup>3</sup>: 519→435→

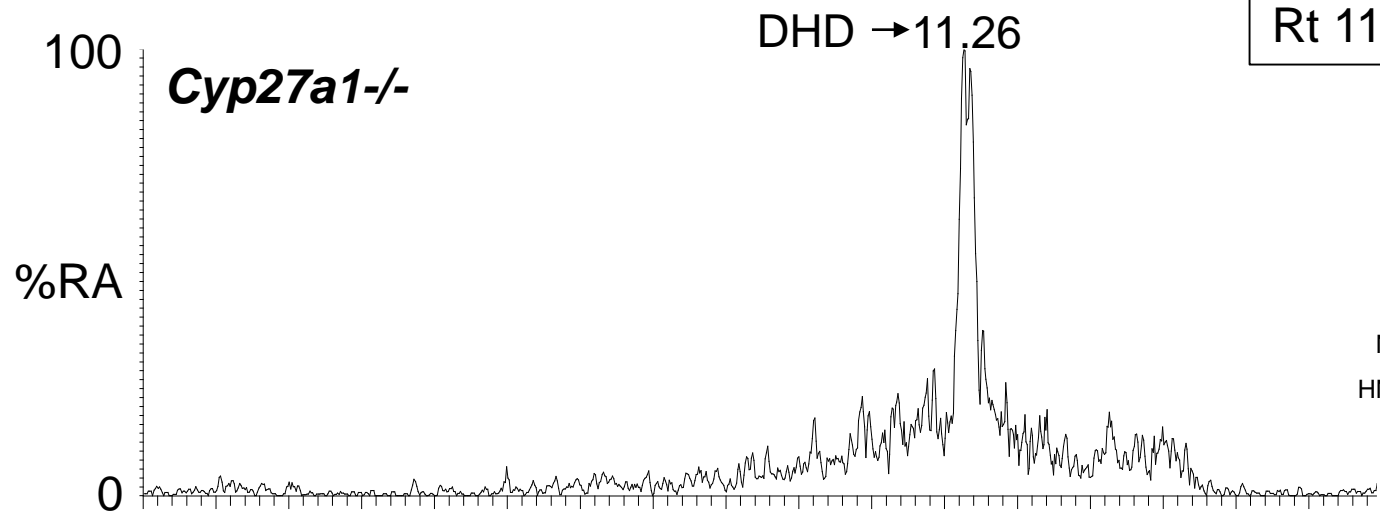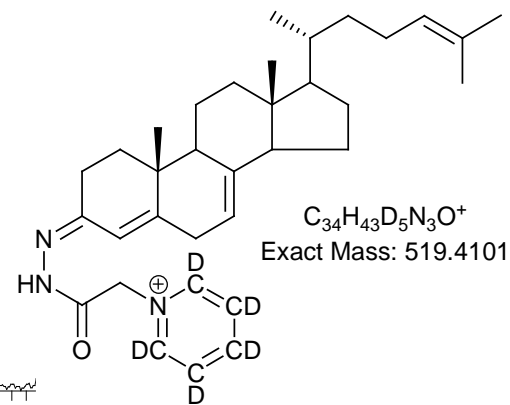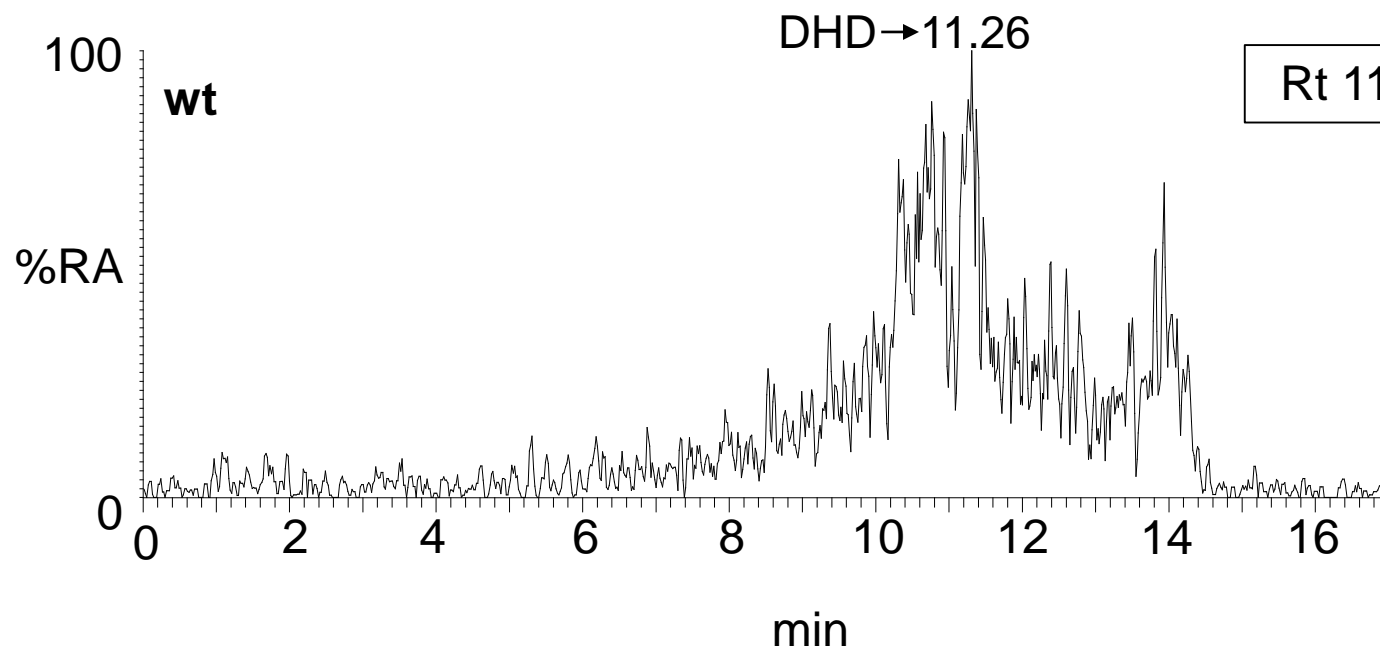

# S6A

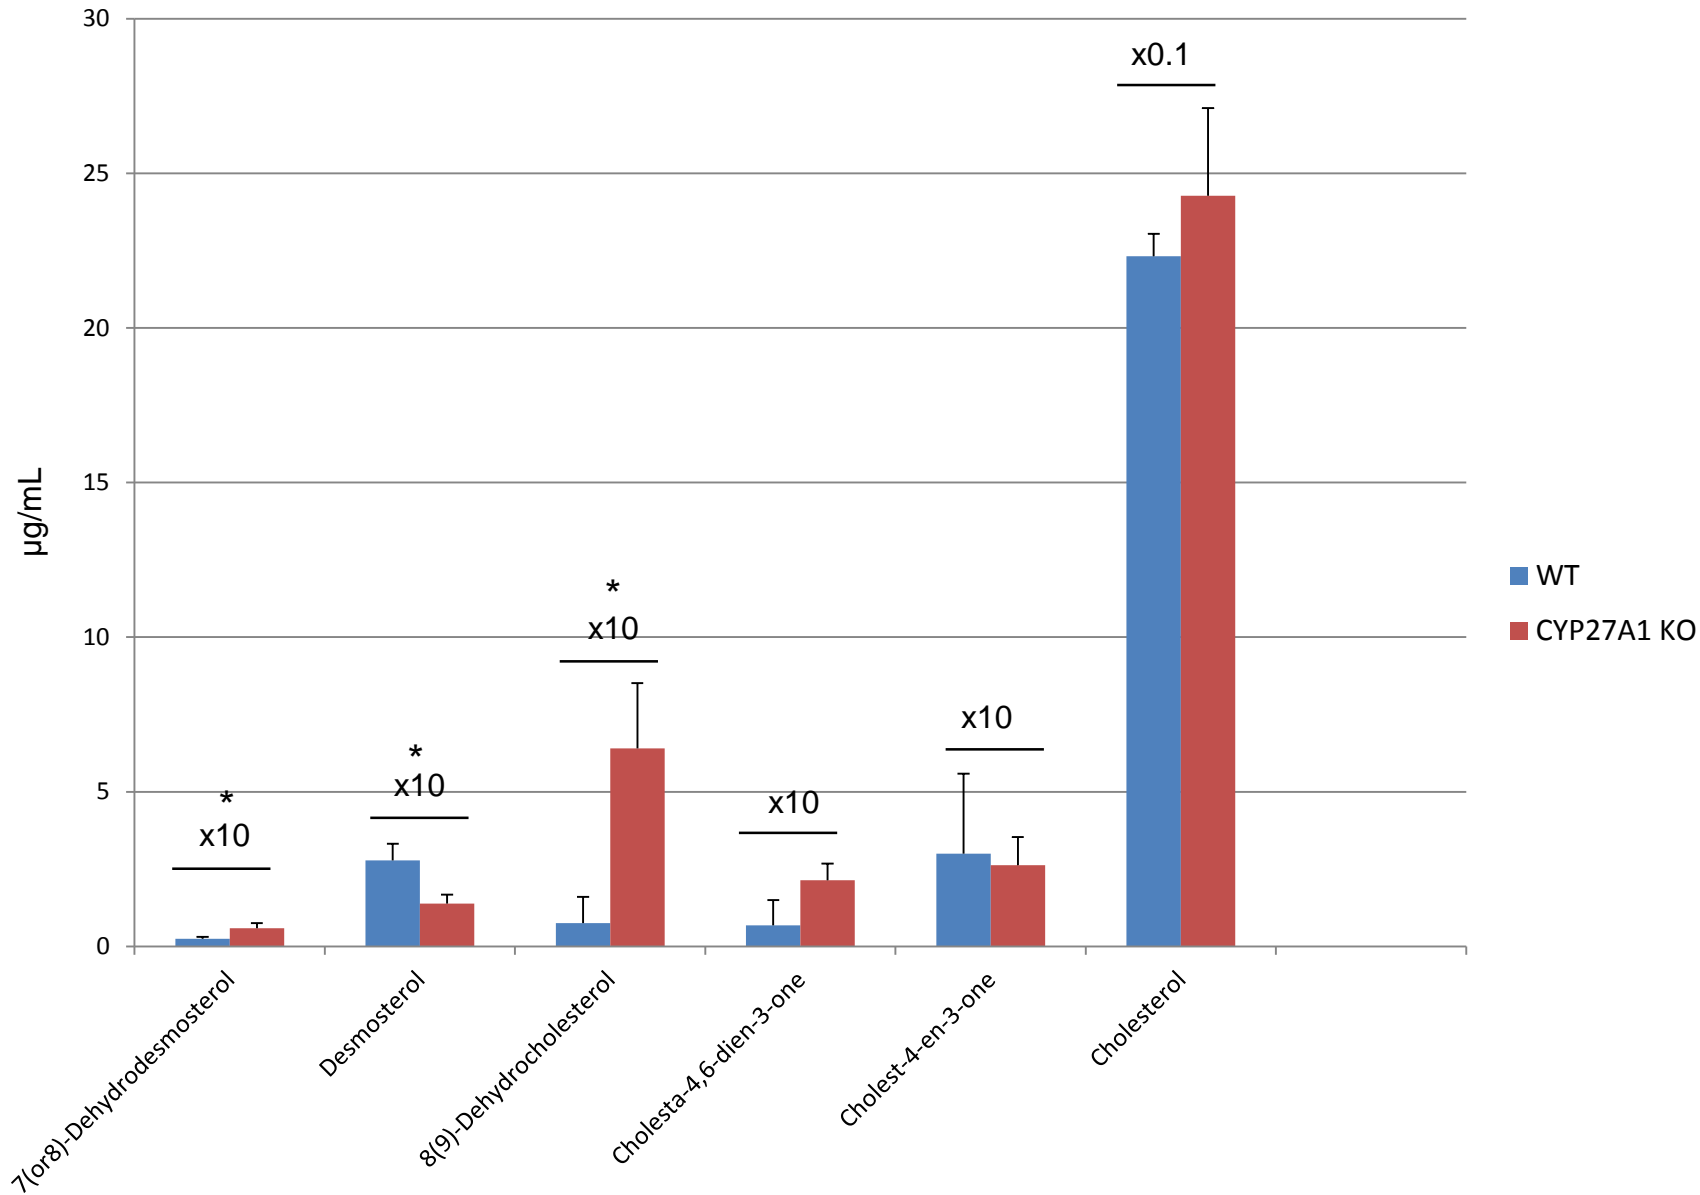

# S6B

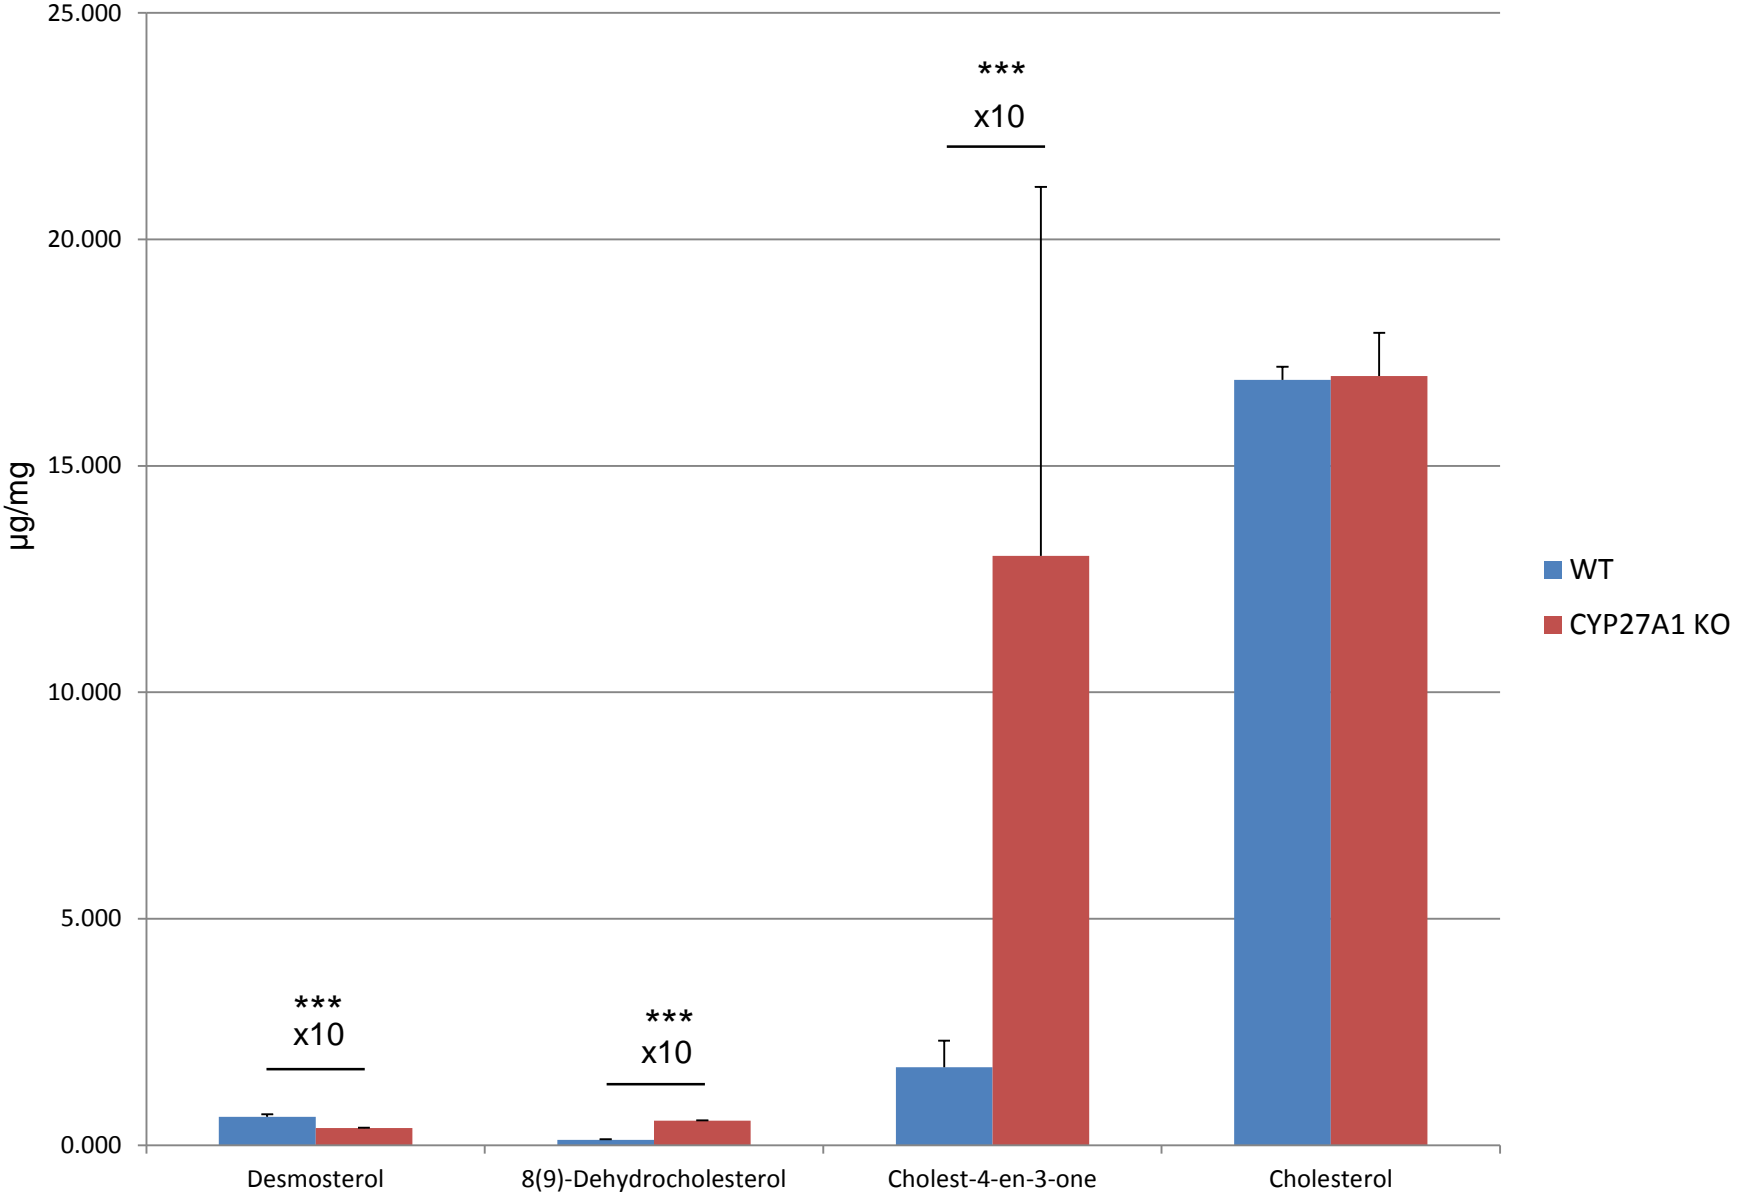

# S7

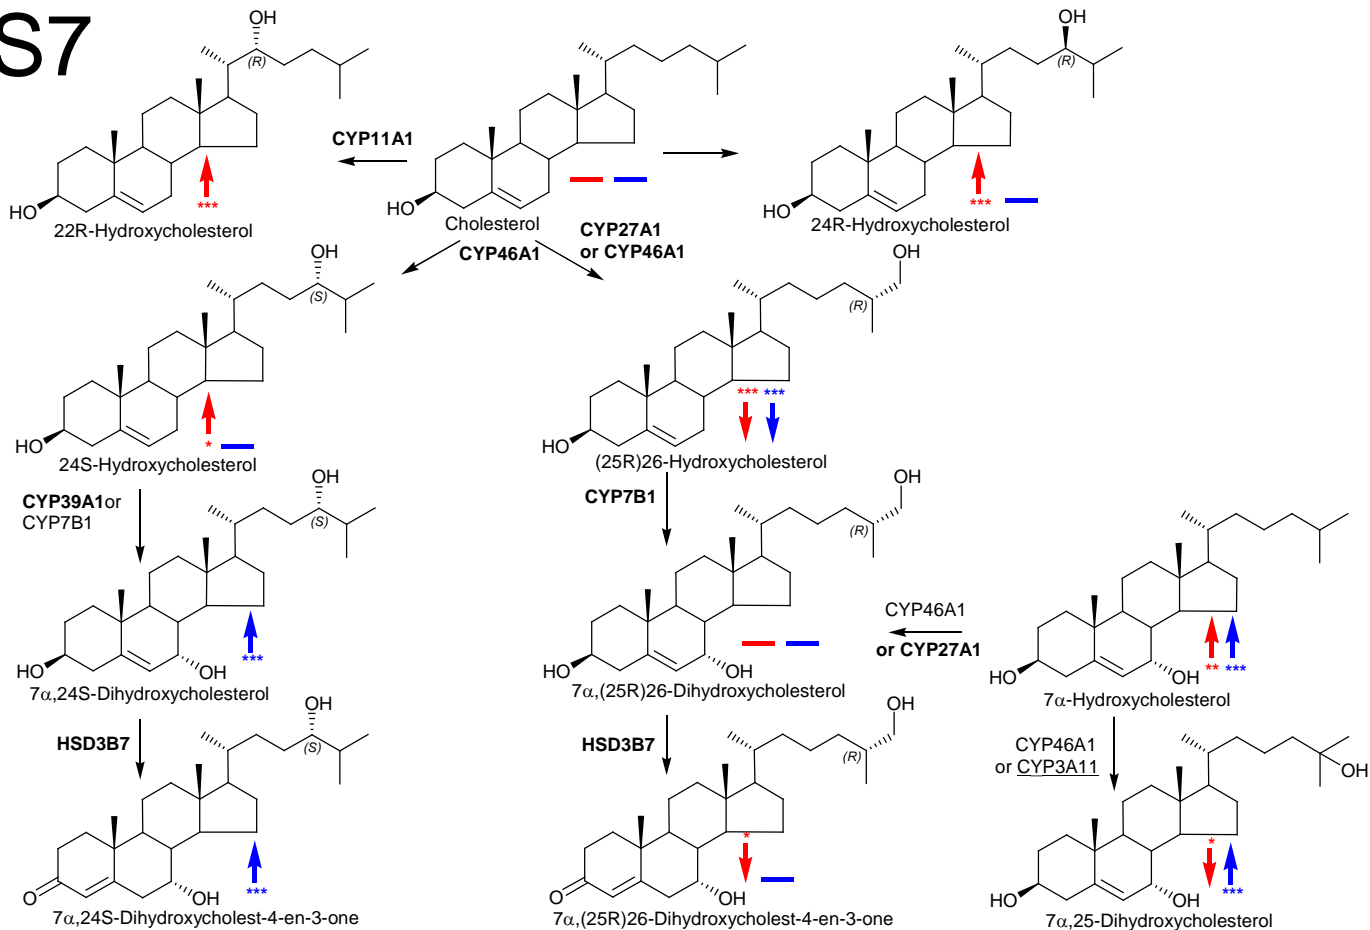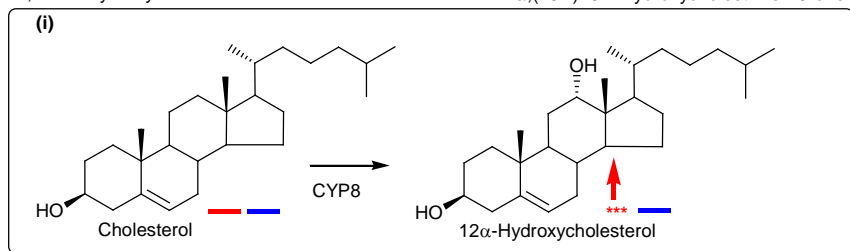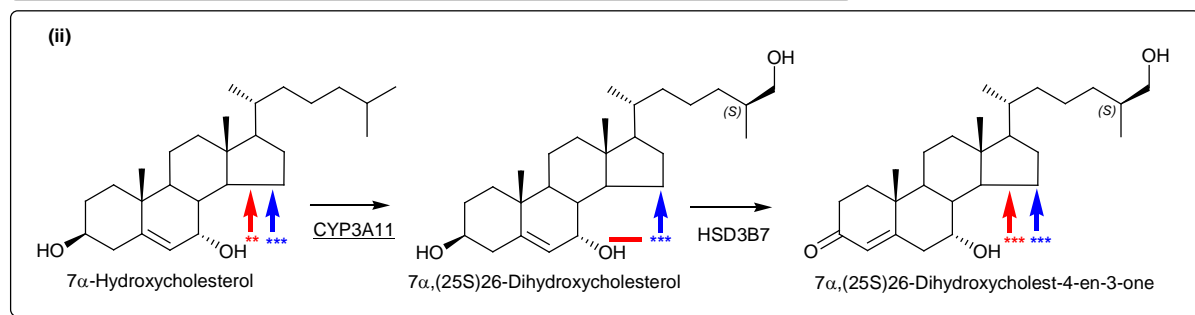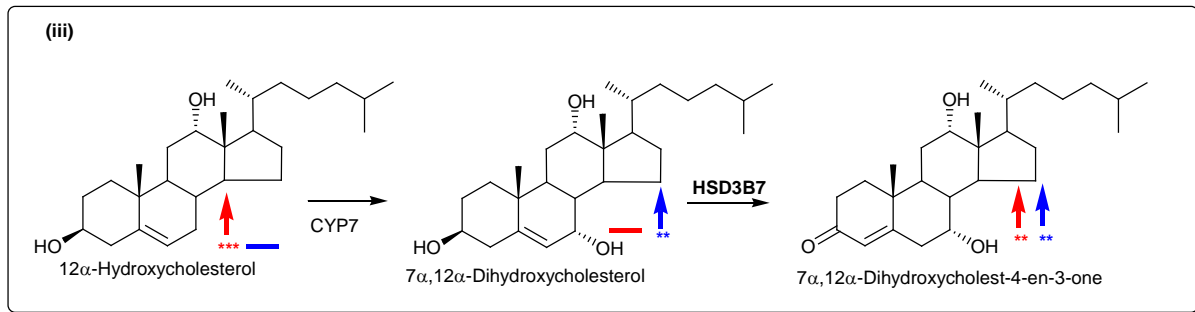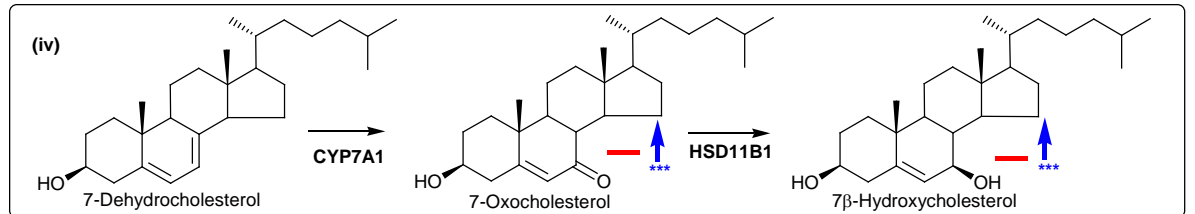

# S8A

RIC: 518.4105 ± 10 ppm

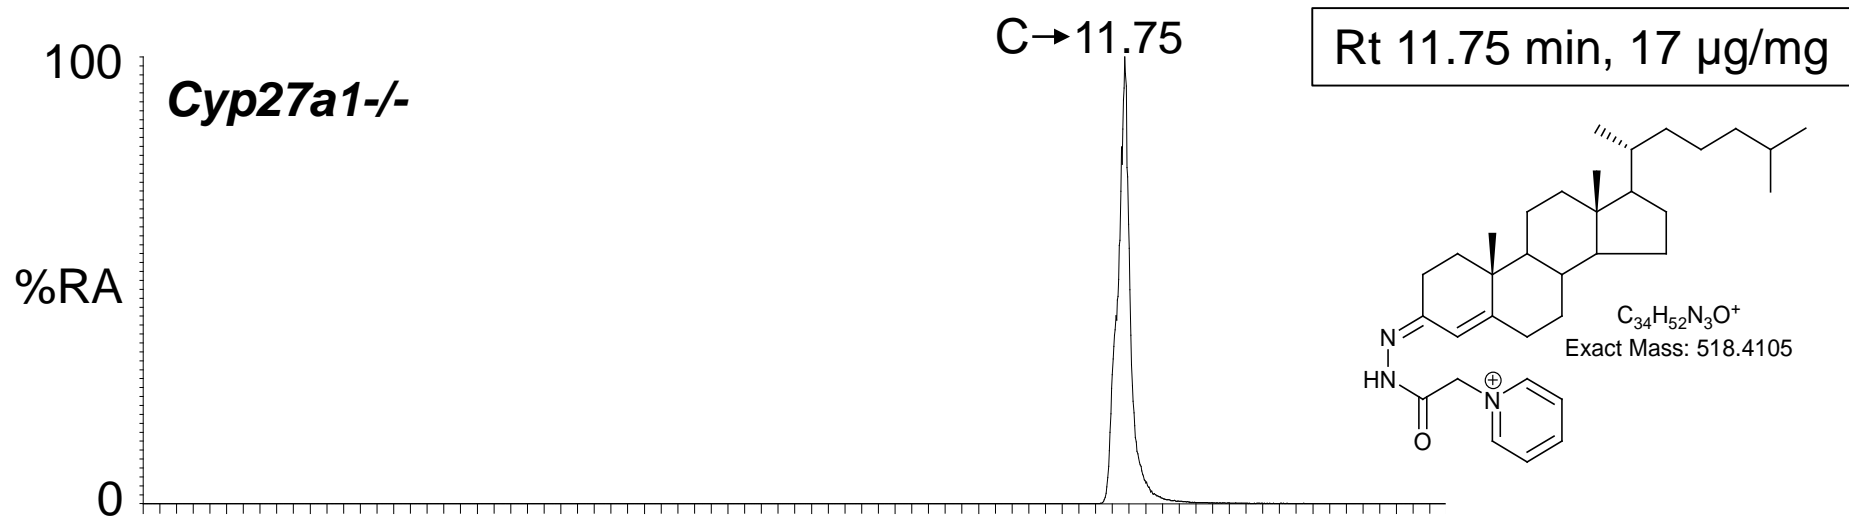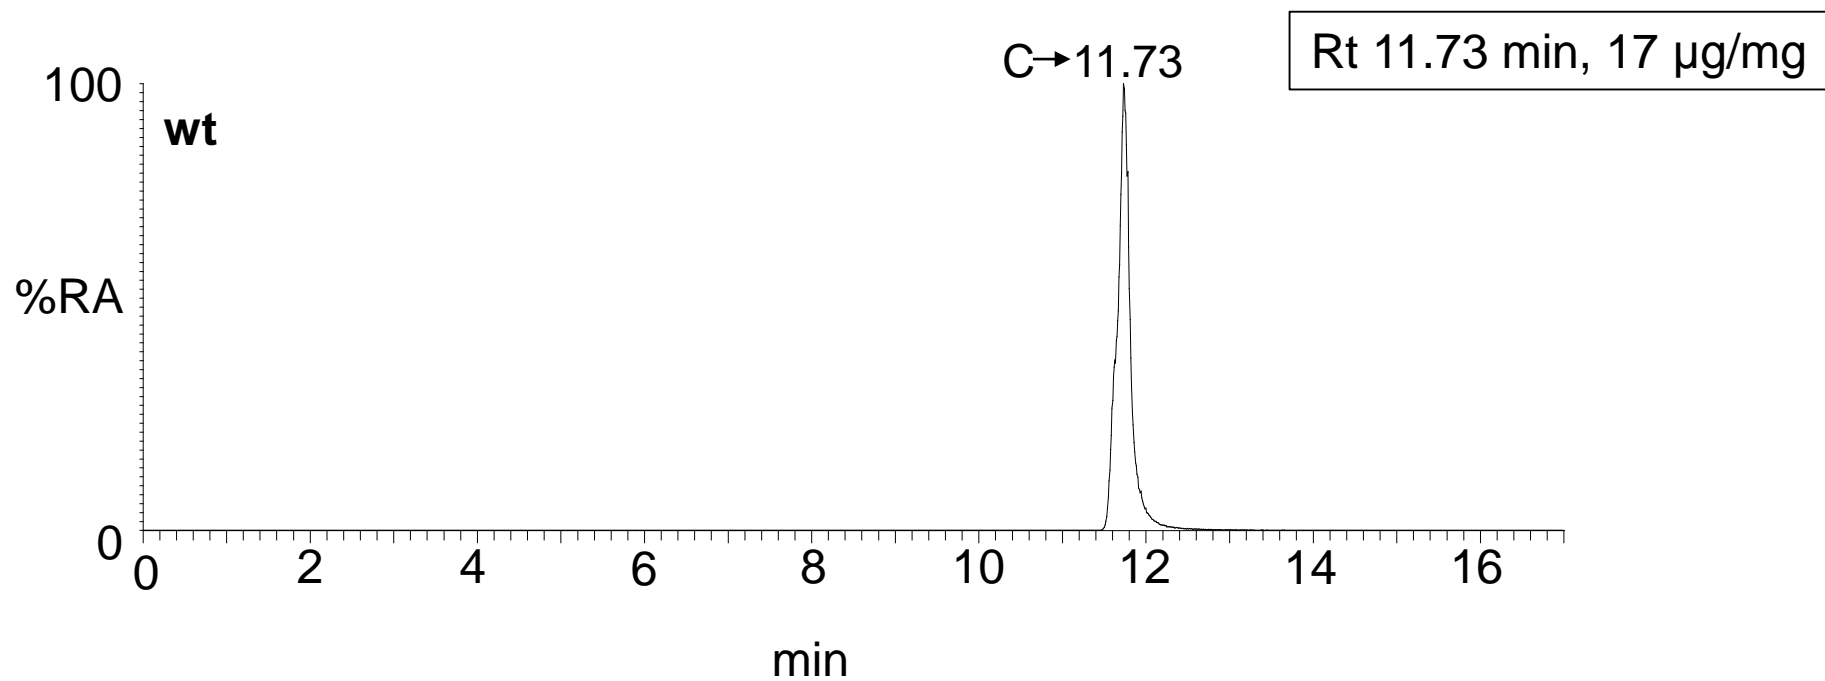

# S8B

MS<sup>3</sup>: 518→439→

*Cyp27a1*<sup>-/-</sup>

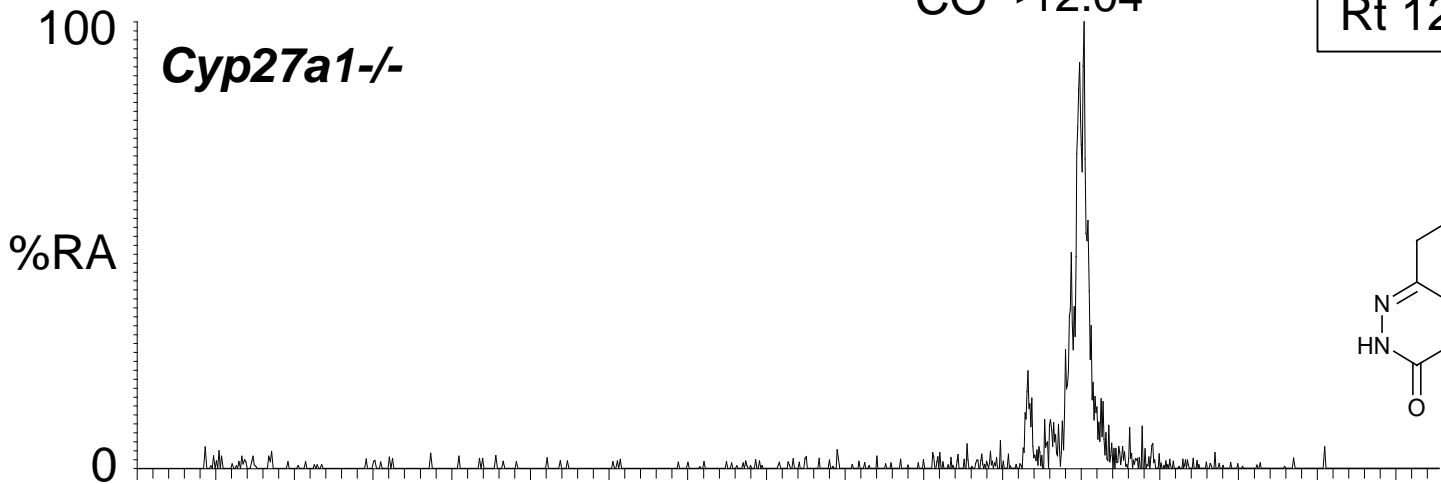

Rt 12.04 min, 1 µg/mg

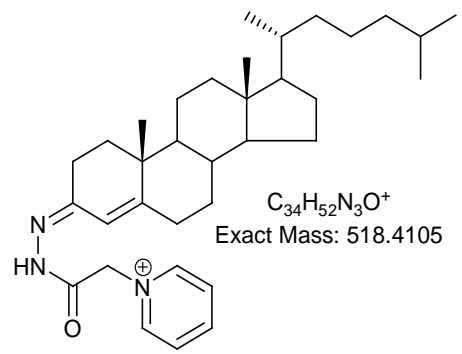

wt

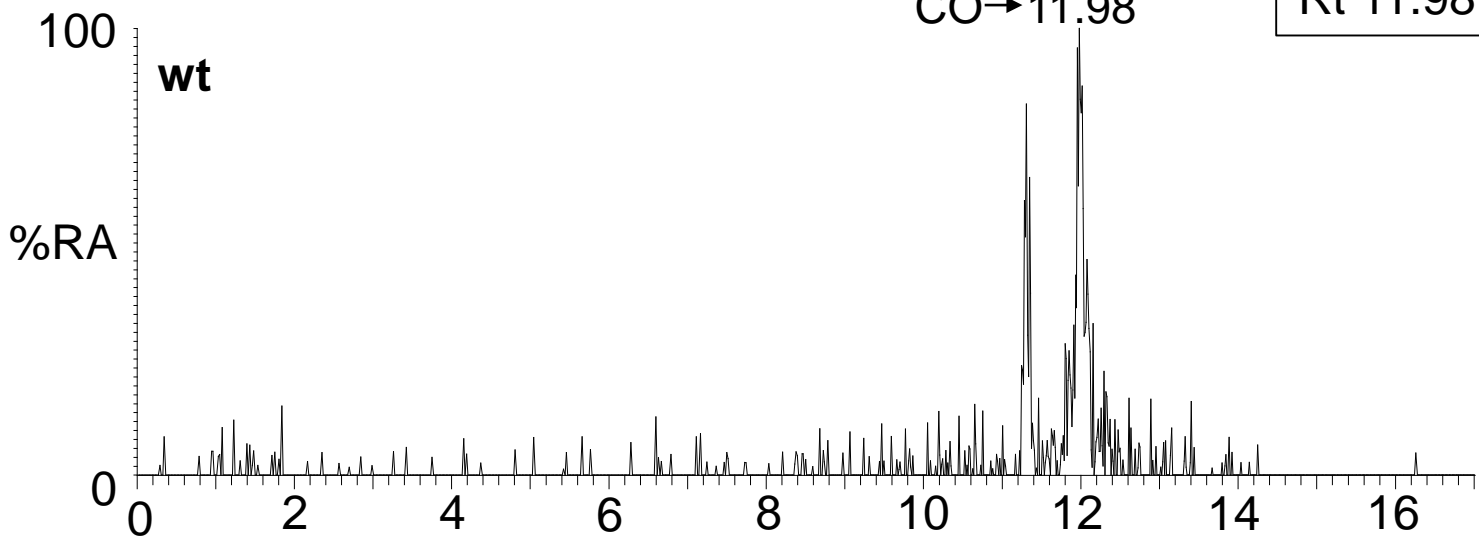

Rt 11.98 min, 0.2 µg/mg

min



# S8C

RIC: 516.3948 ± 10 ppm

*Cyp27a1*<sup>-/-</sup>

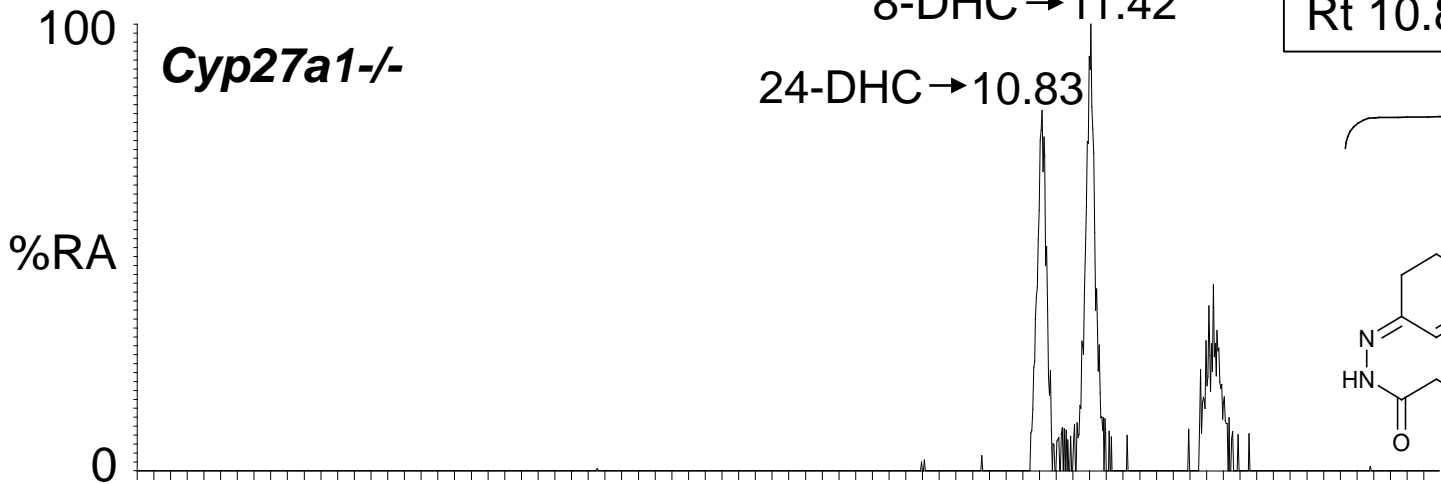

Rt 10.83 min, 0.05 µg/mg

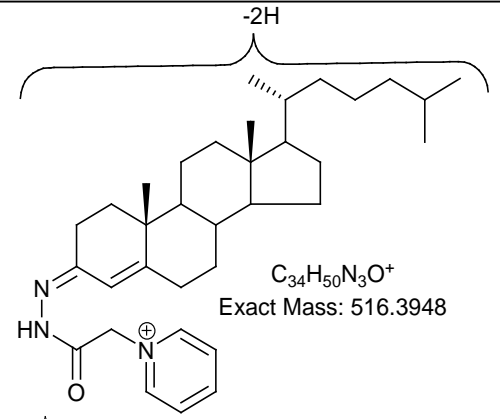

wt

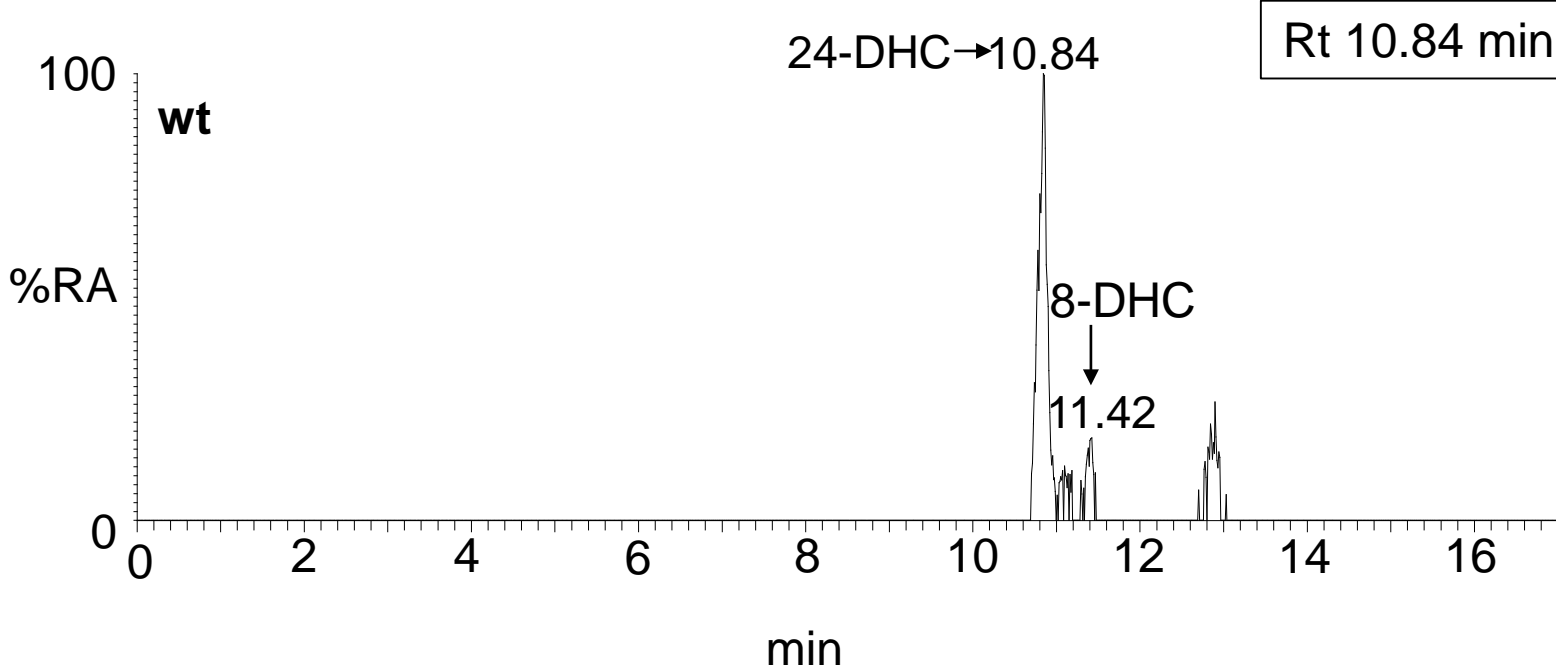

Rt 10.84 min, 0.05 µg/mg

min

# S8D

MS<sup>3</sup>: 516→437→

*Cyp27a1*<sup>-/-</sup>

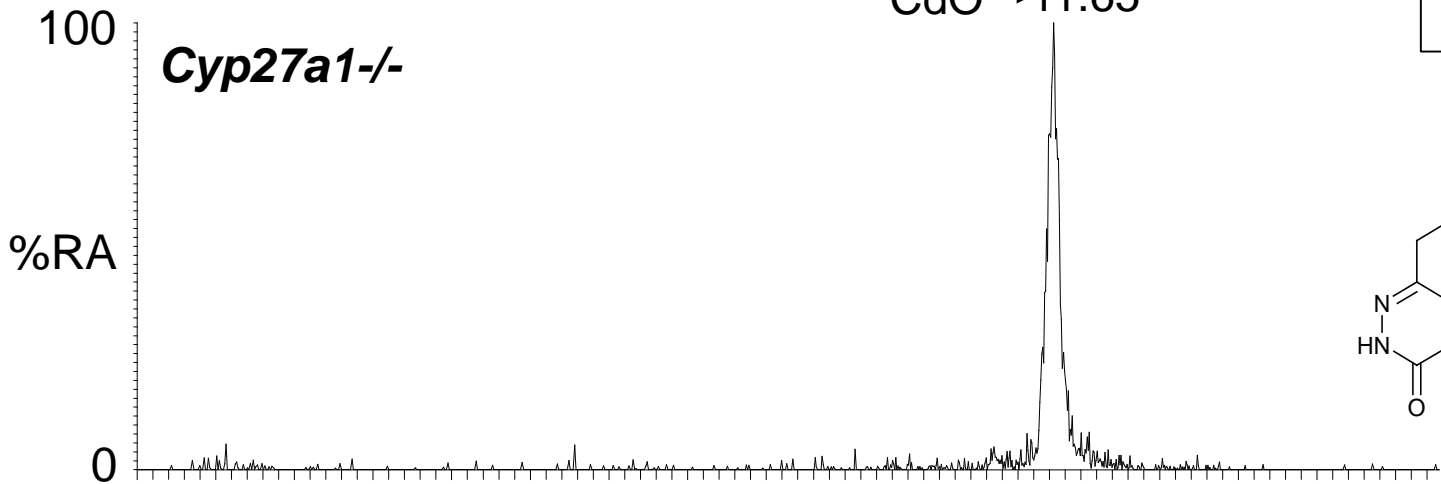

CdO → 11.65

Rt 11.65 min

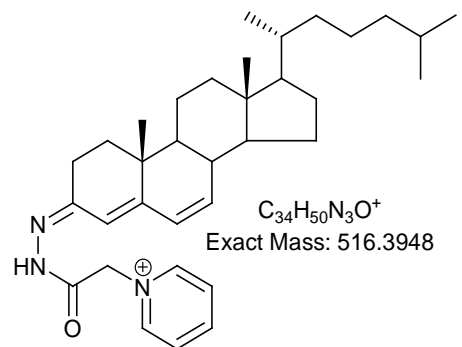

wt

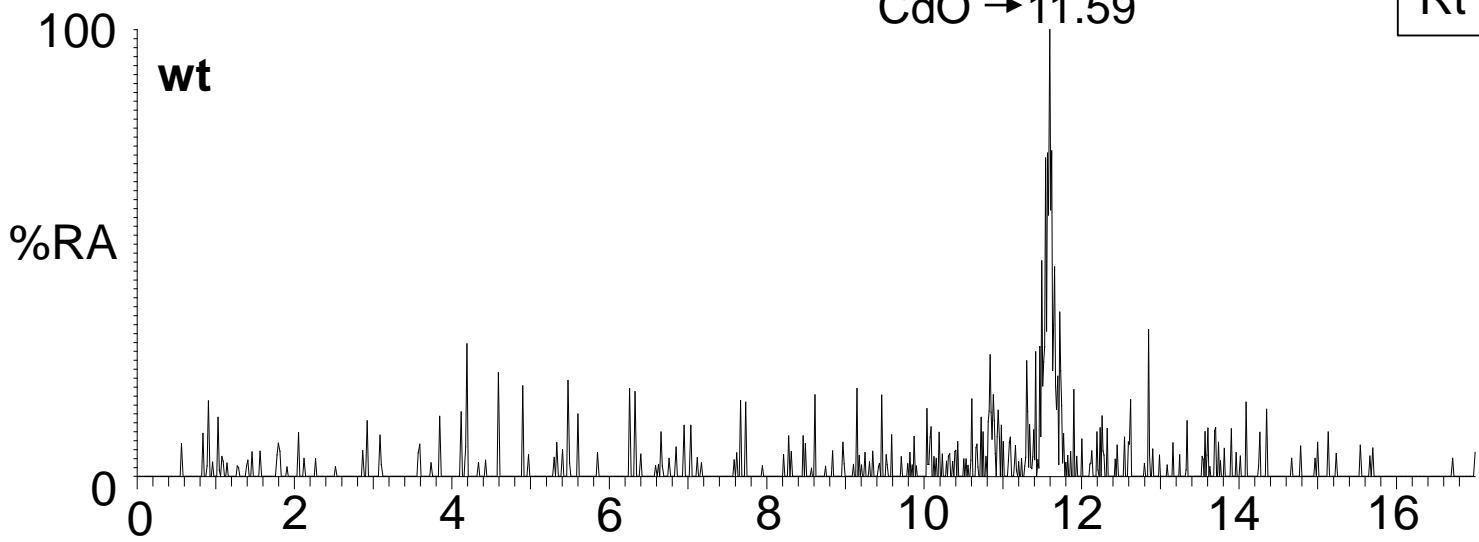

CdO → 11.59

Rt 11.59 min

min
